# Supplementary material for: An ultrasound-controllable ROS-responsive nanoplatform for O2 and NO generation to enhance sonodynamic therapy against multidrug-resistant bacterial infections
Source: Royal Society of Chemistry journal article supplement (doi:10.1039/d3nr04801b), 2023-01-01
Supplement: d3nr04801b1.pdf [file d3nr04801b1.pdf]

## Supporting Information

### **Ultrasound-controllable ROS-responsive nanoplatform for O<sub>2</sub> and NO generation to enhance sonodynamic therapy against multidrug-resistant bacterial infection**

Jingyi Zhang<sup>a,#</sup>, Lin Zhang<sup>b,#</sup>, Yuhan Zhang<sup>a</sup>, Rong Ju<sup>a</sup> and Guoqing Wei<sup>a,\*</sup>

<sup>a</sup> Chengdu Women's and Children's Central Hospital, School of Medicine, University of Electronic Science and Technology of China, Chengdu, 611731, PR China.

<sup>b</sup> Department of Neonatology, People's Hospital of Jianyang City, Jianyang, 641400, PR China.

<sup>#</sup>These authors contributed equally to this work.

Corresponding author: E-mail: [guoqing@uestc.edu.cn](mailto:guoqing@uestc.edu.cn) (G. Wei)

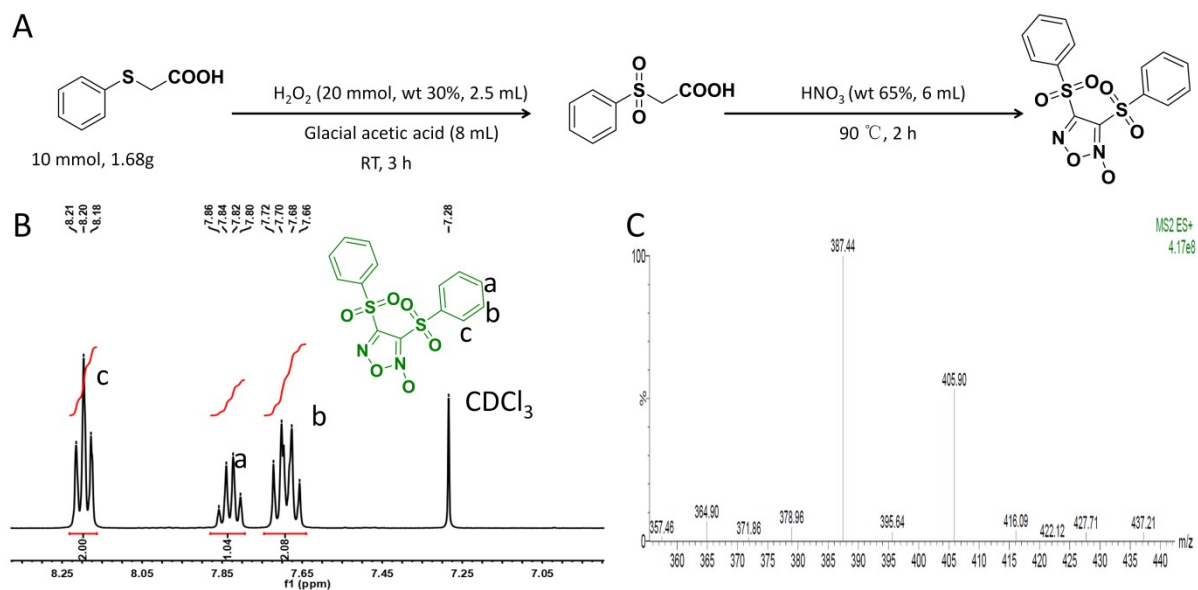

**Figure S1.** (A) Synthetic route and chemical structure of FOT. (B)  $^1\text{H}$  NMR spectrum of synthesized FOT in  $\text{CDCl}_3$   $\delta$  8.20 (t,  $J = 4.0$  Hz, 2H), 7.83 (dd,  $J = 16.0, 8.0$  Hz, 1H), 7.66 (q,  $J = 8.0$  Hz, 2H). (C) The MS of synthesized FOT.

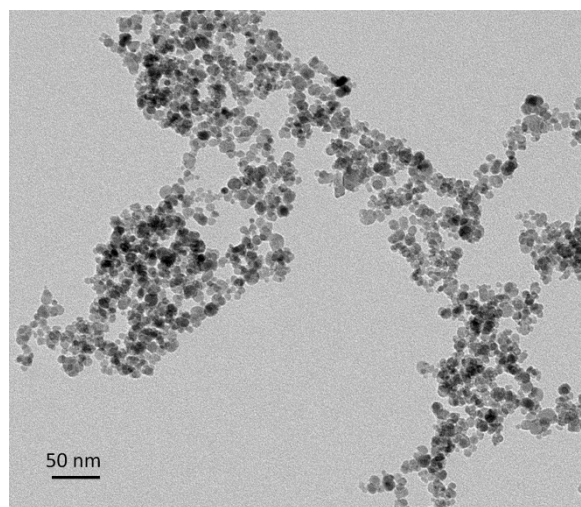

**Figure S2.** Transmission electron microscope images of  $\text{Fe}_3\text{O}_4$  NPs.

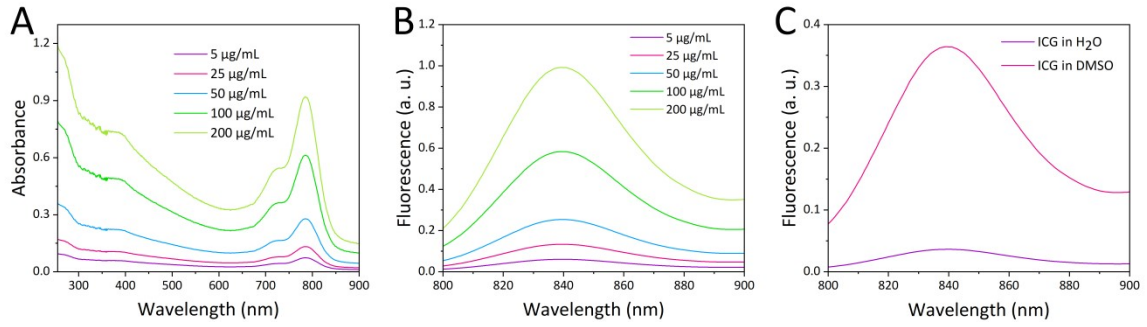

**Figure S3.** (A) UV-vis absorption spectra and (B) Fluorescence intensity of FOT/Fe<sub>3</sub>O<sub>4</sub>@Lipo-ICG at different concentration. (C) Fluorescence intensity of ICG in H<sub>2</sub>O and DMSO.

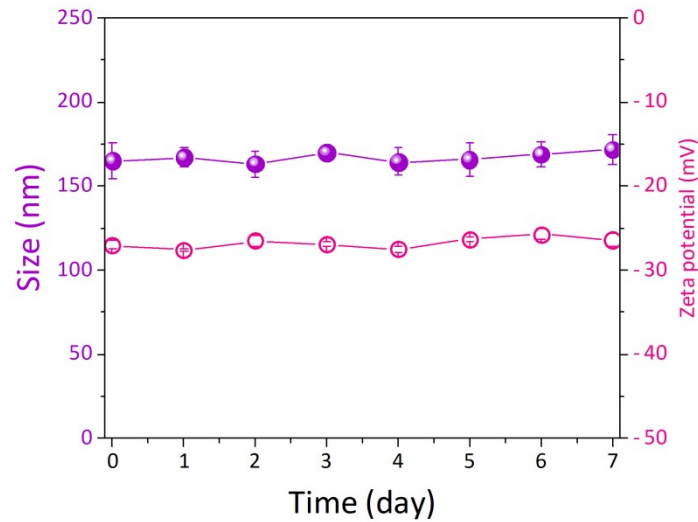

**Figure S4.** Colloidal stability of FOT/Fe<sub>3</sub>O<sub>4</sub>@Lipo-ICG in PBS. Data are presented as mean  $\pm$  s.d. (n = 3).

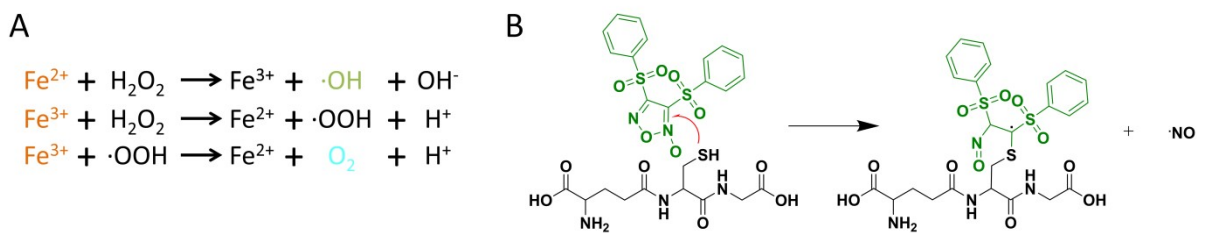

**Figure S5.** (A) The equations of the Fenton reaction. (B) The mechanism of GSH-mediated NO release from FOT.

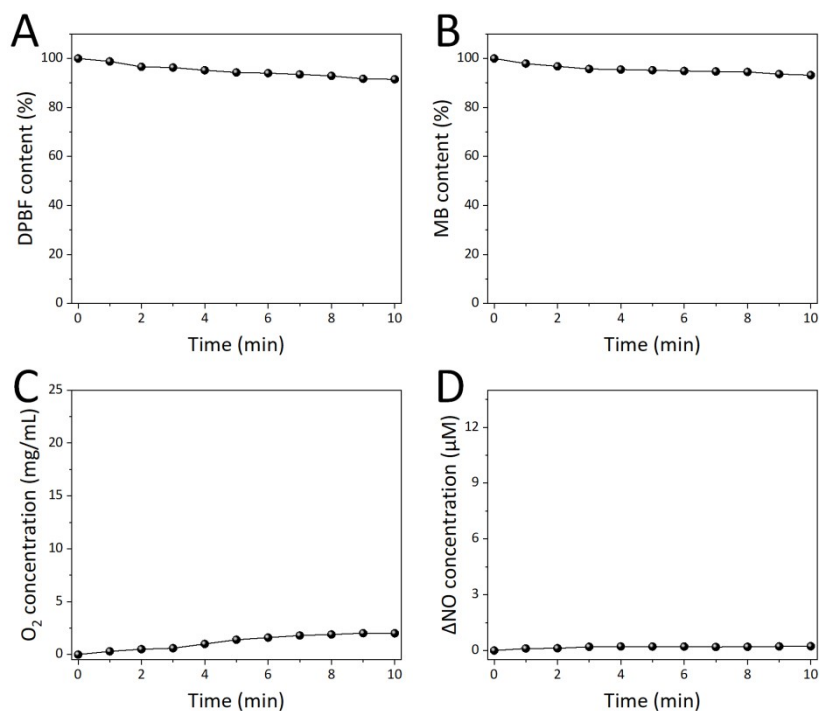

**Figure S6.** (A) Consumption of DPBF due to  $\bullet\text{O}_2^-$ , (B) Consumption of MB due to  $\bullet\text{OH}$ , (C) O<sub>2</sub> generation and (D) NO generation of H<sub>2</sub>O<sub>2</sub> with US irradiation. US irradiation: 1.0 MHz, 1.0 W/cm<sup>2</sup>, 40% cycle.

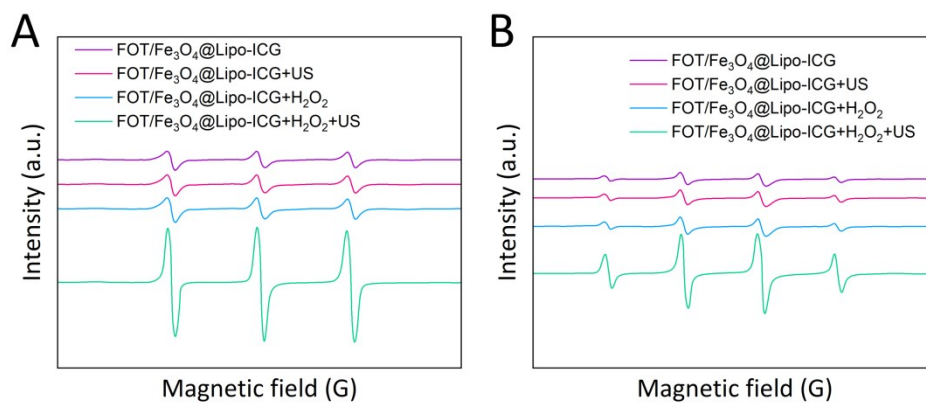

**Figure S7.** Electron spin resonance spectra of <sup>1</sup>O<sub>2</sub> (A) and  $\bullet\text{OH}$  (B) in FOT/Fe<sub>3</sub>O<sub>4</sub>@Lipo-ICG and FOT/Fe<sub>3</sub>O<sub>4</sub>@Lipo-ICG+H<sub>2</sub>O<sub>2</sub> dispersions after US irradiation or not. The concentration of H<sub>2</sub>O<sub>2</sub> was 1 mM. US irradiation: 1.0 MHz, 1.0 W/cm<sup>2</sup>, 40% cycle.

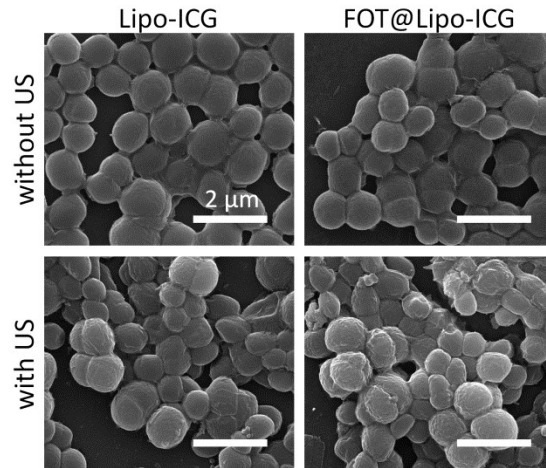

**Figure S8.** SEM images of MRSA after different treatments. US irradiation: 1.0 MHz, 1.0 W/cm<sup>2</sup>, 40% cycle.

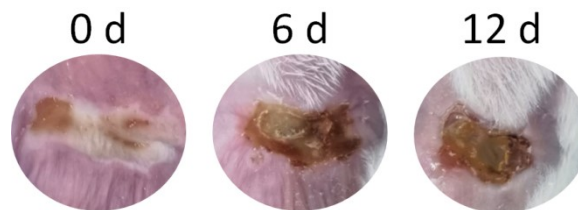

**Figure S9.** Photographs of the MRSA-infected skin during treatment with FOT/Fe<sub>3</sub>O<sub>4</sub>@Lip-ICG without US irradiation at 0, 6 and 12 days.

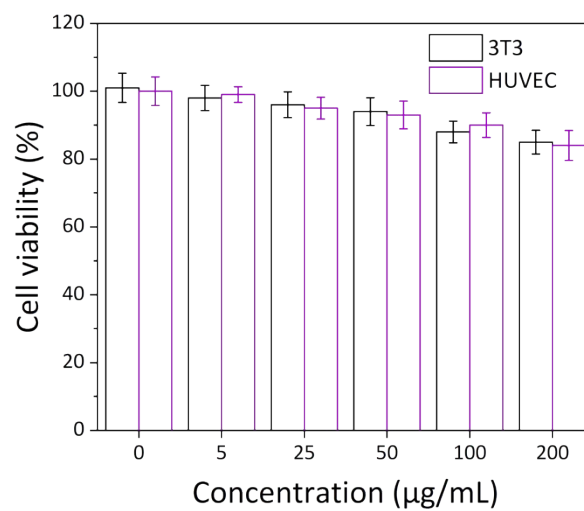

**Figure S10.** Cell viability of HUVEC and 3T3 treated with different concentrations of FOT/Fe<sub>3</sub>O<sub>4</sub>@Lipo-ICG. Data are presented as mean ± s.d. (n = 3).

**Table S1.** Properties of liposomes.

| Entry | Liposomes                                    | Size (nm)    | PDI <sup>a</sup> | Zeta potential (mv) |
|-------|----------------------------------------------|--------------|------------------|---------------------|
| 1     | Lipo-ICG                                     | 90.3 ± 7.4   | 0.18 ± 0.04      | -22.5 ± 0.4         |
| 2     | FOT@Lipo-ICG                                 | 140.2 ± 6.9  | 0.17 ± 0.02      | -26.6 ± 0.2         |
| 3     | FOT/Fe <sub>3</sub> O <sub>4</sub> @Lipo-ICG | 165.1 ± 10.8 | 0.18 ± 0.02      | -27.7 ± 0.5         |

<sup>a</sup> Polydispersity index (PDI).

**Table S2.** LE and EE of FOT/Fe<sub>3</sub>O<sub>4</sub>@Lipo-ICG.

| Liposomes                                    | LE <sup>a</sup> (%) |                                | EE <sup>b</sup> (%) |                                |
|----------------------------------------------|---------------------|--------------------------------|---------------------|--------------------------------|
|                                              | FOT                 | Fe <sub>3</sub> O <sub>4</sub> | FOT                 | Fe <sub>3</sub> O <sub>4</sub> |
| FOT@Lipo-ICG                                 | 5.4 ± 0.6           | –                              | 70.0 ± 4.4          | –                              |
| FOT/Fe <sub>3</sub> O <sub>4</sub> @Lipo-ICG | 5.4 ± 0.5           | 8.0 ± 0.7                      | 70.0 ± 3.2          | 80.0 ± 4.3                     |

<sup>a</sup> Loading efficiency (LE).

<sup>b</sup> Entrapment efficiency (EE).
