# Supplementary material for: An ultrasound-controllable ROS-responsive nanoplatform for O2 and NO generation to enhance sonodynamic therapy against multidrug-resistant bacterial infections
Source: Royal Society of Chemistry journal article supplement (doi:10.1039/d3nr04801b), 2023-01-01
Supplement: d3nr04801b2.pdf [file d3nr04801b2.pdf]

**Table S1.** Properties of liposomes.

| Entry | Liposomes                                    | Size (nm)    | PDI <sup>a</sup> | Zeta potential (mv) |
|-------|----------------------------------------------|--------------|------------------|---------------------|
| 1     | Lipo-ICG                                     | 90.3 ± 7.4   | 0.18 ± 0.04      | -22.5 ± 0.4         |
| 2     | FOT@Lipo-ICG                                 | 140.2 ± 6.9  | 0.17 ± 0.02      | -26.6 ± 0.2         |
| 3     | FOT/Fe <sub>3</sub> O <sub>4</sub> @Lipo-ICG | 165.1 ± 10.8 | 0.18 ± 0.02      | -27.7 ± 0.5         |

<sup>a</sup> Polydispersity index (PDI).

**Table S2.** LE and EE of FOT/Fe<sub>3</sub>O<sub>4</sub>@Lipo-ICG.

| Liposomes                                    | LE <sup>a</sup> (%) |                                | EE <sup>b</sup> (%) |                                |
|----------------------------------------------|---------------------|--------------------------------|---------------------|--------------------------------|
|                                              | FOT                 | Fe <sub>3</sub> O <sub>4</sub> | FOT                 | Fe <sub>3</sub> O <sub>4</sub> |
| FOT@Lipo-ICG                                 | 5.4 ± 0.6           | –                              | 70.0 ± 4.4          | –                              |
| FOT/Fe <sub>3</sub> O <sub>4</sub> @Lipo-ICG | 5.4 ± 0.5           | 8.0 ± 0.7                      | 70.0 ± 3.2          | 80.0 ± 4.3                     |

<sup>a</sup> Loading efficiency (LE).

<sup>b</sup> Entrapment efficiency (EE).
